# Supplementary material for: Dual information encryption of carbon dots endowed with recoverable functions after interception
Source: Royal Society of Chemistry journal article supplement (doi:10.1039/d0nj06251k), 2021-01-01
Supplement: d0nj06251k1.pdf [file d0nj06251k1.pdf]

## Supporting Information

### **Dual Information Encryption of Carbon Dots Endowed with Recoverable Functions after Interception**

*Chen Yang,<sup>a,†</sup> Ru Li,<sup>a,†</sup> Jun Zhang,<sup>\*a</sup> Zhi-Kai Cao,<sup>a</sup> Chun-Li Liu,<sup>a</sup> Meng Zhang,<sup>a</sup> Wen-Peng Han,<sup>a</sup> Seeram Ramakrishna,<sup>b</sup> Yun-Ze Long<sup>\*a</sup>*

<sup>a</sup> Collaborative Innovation Center for Nanomaterials & Devices, College of Physics, Qingdao University, Qingdao 266071, China

<sup>b</sup> Center for Nanofibers & Nanotechnology, Department of Mechanical Engineering, National University of Singapore, Singapore 117574, Singapore

\* Address correspondence to iamjunzhang@163.com and yunze.long@163.com.

† These two authors contributed equally to this work.

**Table S1** Information encryption in this work compared to other materials.

| <b>Materials</b>                     | <b>Encryption reagents</b>                   | <b>Decryption reagents</b> | <b>Encryption categories</b> | <b>Security</b> | <b>Ref.</b> |
|--------------------------------------|----------------------------------------------|----------------------------|------------------------------|-----------------|-------------|
| g-C <sub>3</sub> N <sub>4</sub> QDs  | H <sub>2</sub> C <sub>2</sub> O <sub>4</sub> | NaHCO <sub>3</sub>         | single                       | low             | [S1]        |
| Perovskite QDs                       | butyl amine                                  | CH <sub>3</sub> COOH       | single                       | low             | [S2]        |
| Graphene QDs and Eu <sup>3+</sup> DP | Cu <sup>2+</sup> and CA                      | Cys                        | multiple                     | high            | [S3]        |
| CDs                                  | Cu <sup>2+</sup> and Fe <sup>3+</sup>        | EDTA and AA                | multiple                     | high            | This work   |

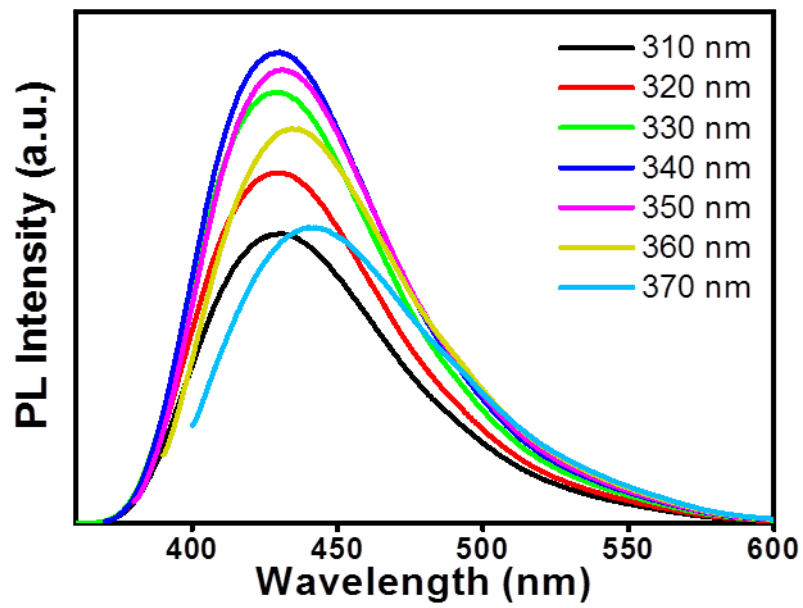

**Fig. S1** PL spectra of CDs excited by different excitation wavelengths.

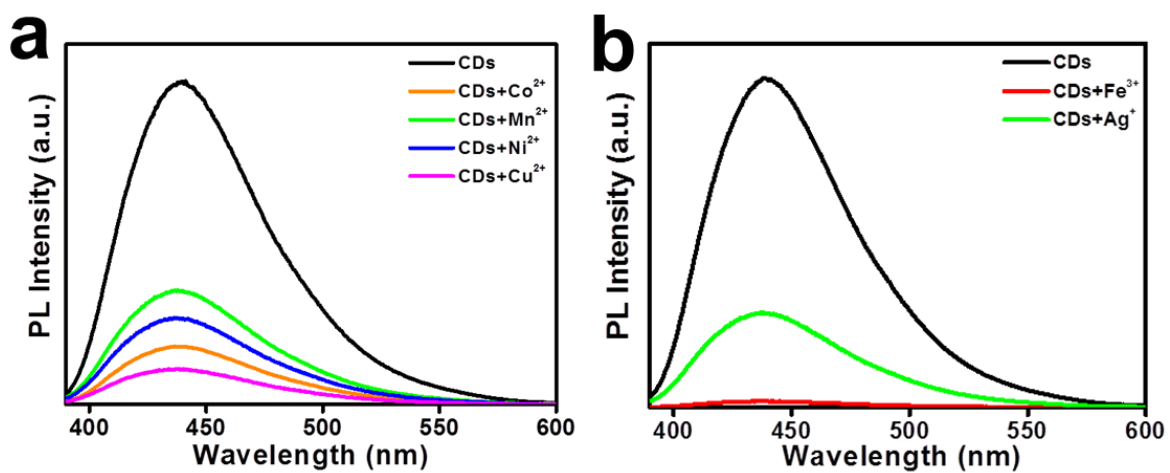

**Fig. S2** The PL spectra of CDs quenched by different metal ions.

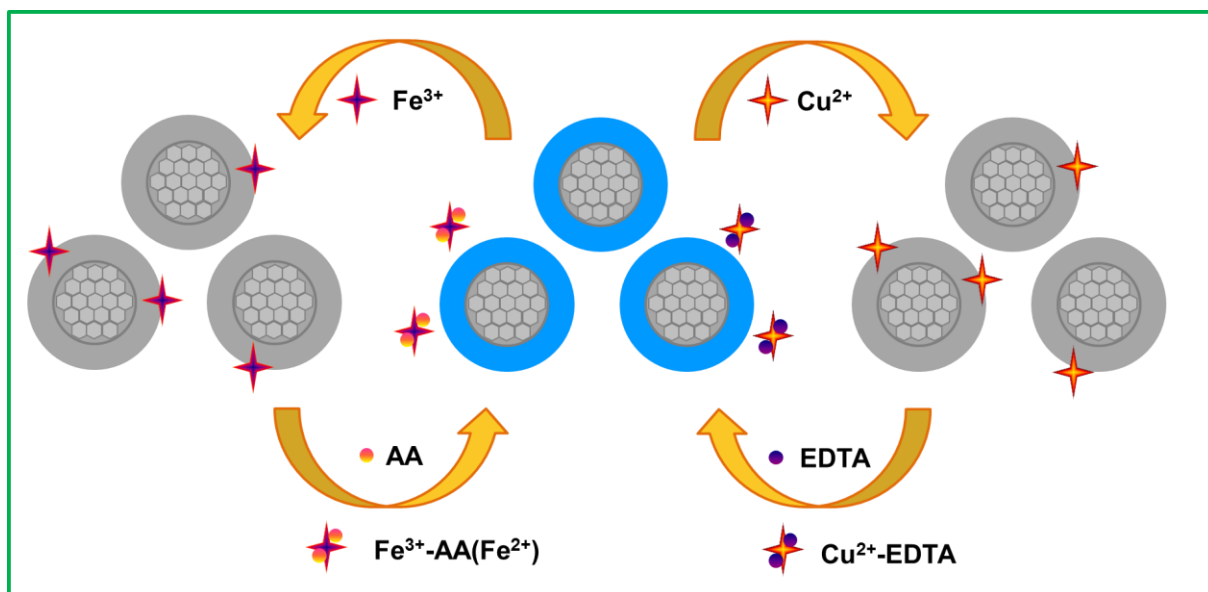

**Fig. S3** The encryption and decryption mechanisms.

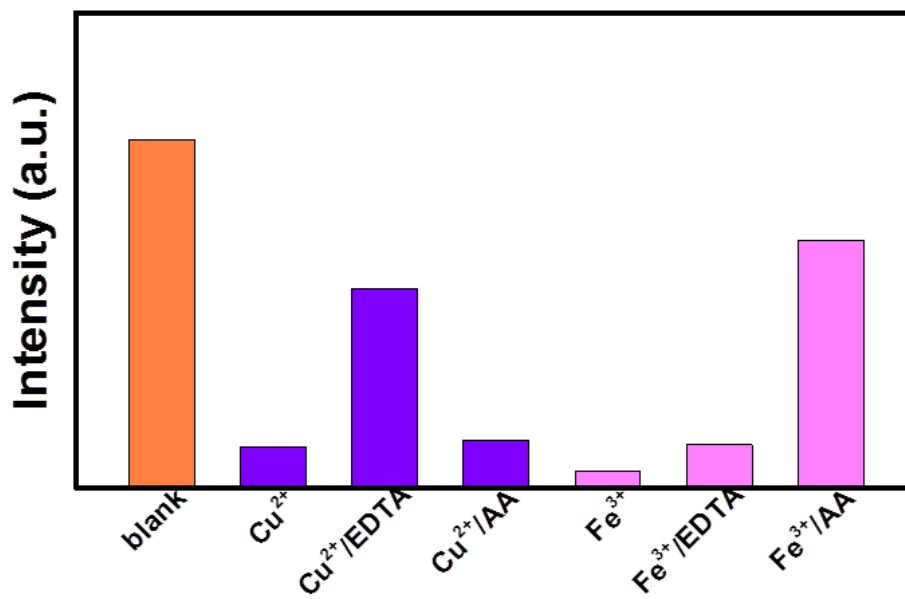

**Fig. S4** PL intensity of CDs after adding different encrypting and decrypting reagents.

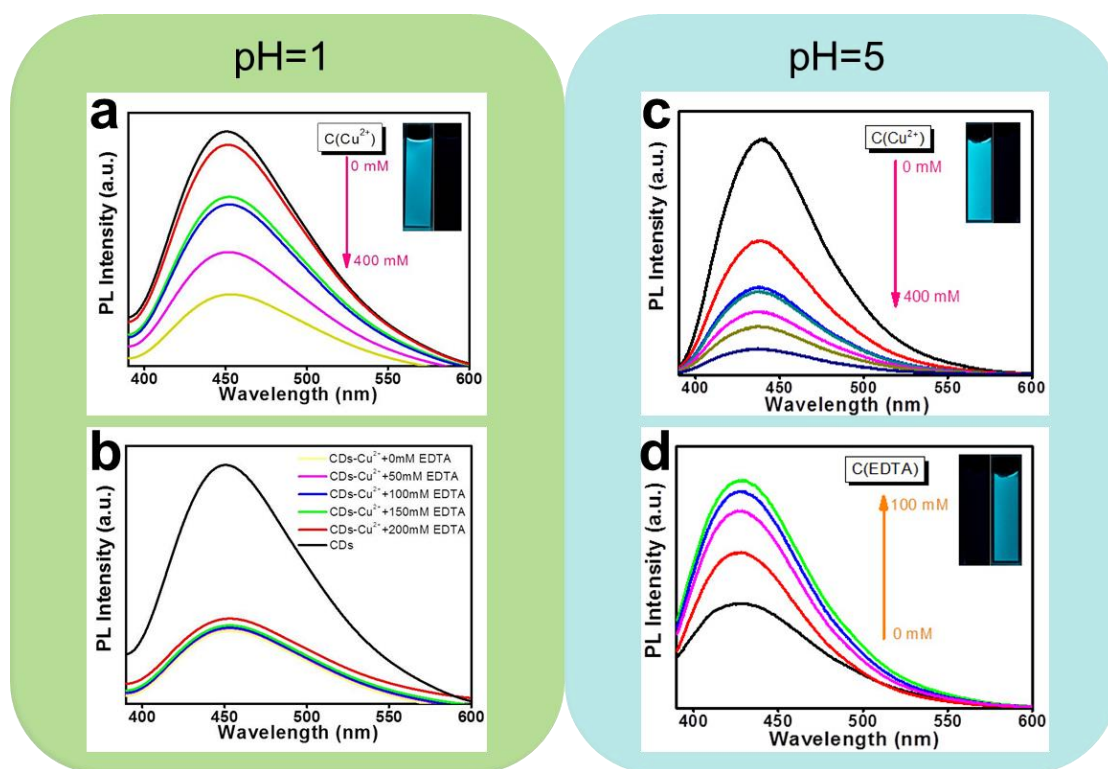

**Fig. S5** At pH=1, (a) the fluorescence of CDs can be quenched by  $\text{Cu}^{2+}$ , (b) EDTA cannot recover CDs PL. At pH=5, (c) the fluorescence of CDs can be quenched by  $\text{Cu}^{2+}$ , (d) and EDTA can recover CDs PL.

As shown in Fig. S5, when CDs at pH=1, EDTA cannot recover the fluorescence of  $\text{CDs-Cu}^{2+}$ . When CDs at pH=5, EDTA can recover the fluorescence of  $\text{CDs-Cu}^{2+}$ . The reason is that the strong acid environment may destroy the process, namely EDTA replacing  $\text{Cu}^{2+}$  out of the  $\text{CDs-Cu}^{2+}$ , so that fluorescence of  $\text{CDs-Cu}^{2+}$  cannot be recovered.

**The reason for AA could recover fluorescence of CDs-Fe<sup>3+</sup>, but EDTA cannot recover:**

The reason for AA can recover fluorescence of CDs-Fe<sup>3+</sup> but EDTA cannot is that AA is based on redox mechanism and EDTA is based on complex mechanism. When AA is added to the CDs-Fe<sup>3+</sup>, due to that reduction reaction can happen from Fe<sup>3+</sup> to Fe<sup>2+</sup>, and Fe<sup>3+</sup> is better than Fe<sup>2+</sup> for the strong oxidability of Fe<sup>3+</sup> in electron acquisition, so that the fluorescence recovers.<sup>S4, S5</sup> When EDTA is added to the CDs-Fe<sup>3+</sup>, due to that the pH ranges from 1.5 to 2.5 is the complexation formation conditions of Fe<sup>3+</sup> and EDTA,<sup>S6</sup> the complex reaction cannot happen between EDTA and Fe<sup>3+</sup>, so that the EDTA cannot recover fluorescence of CDs-Fe<sup>3+</sup>.



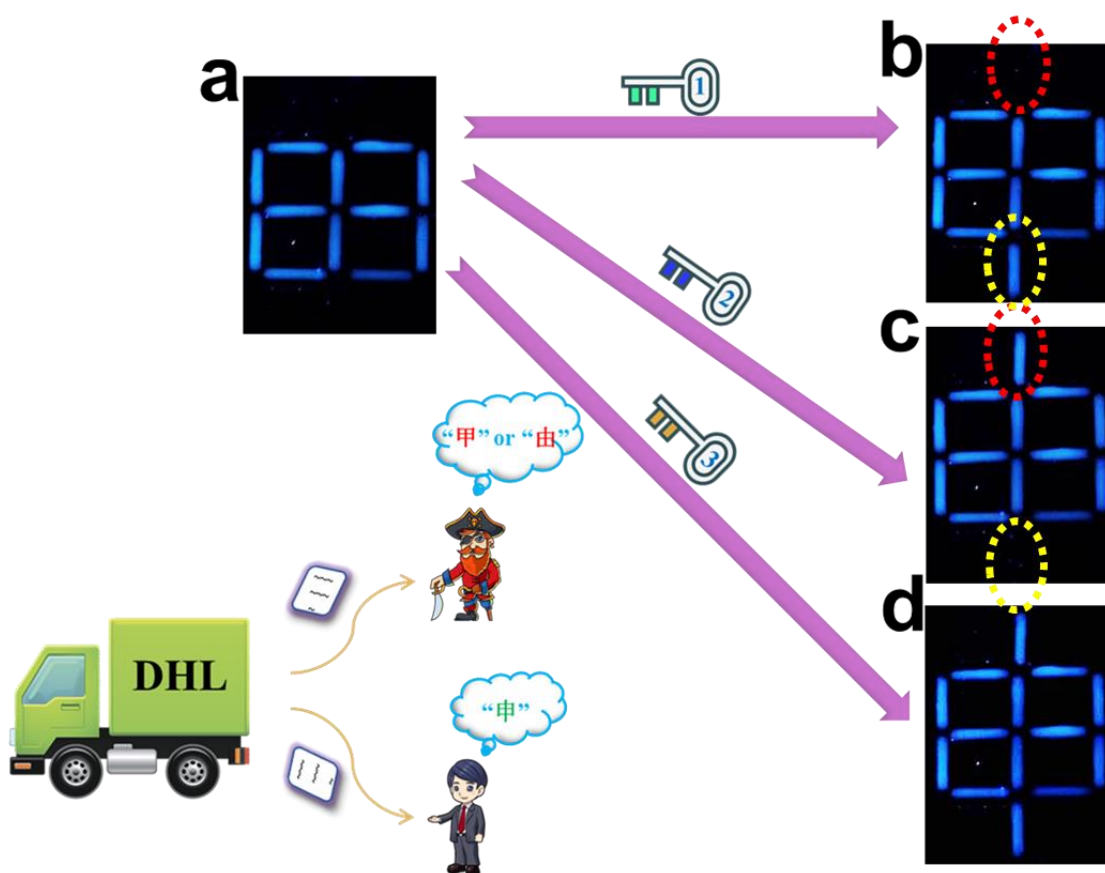

**Fig. S6** The red circle only adds encryption reagent of  $\text{Fe}^{3+}$ , the yellow circle only adds encryption reagent of  $\text{Cu}^{2+}$ .

As shown in Fig. S6, adding only one decryption reagent (key-1 or key-2) will result in different information. That is, the information encrypts of yellow circle part can only be decrypted by key-1 but cannot by key-2, the information encrypts of red circle part can only be decrypted by key-2 but cannot by key-1.

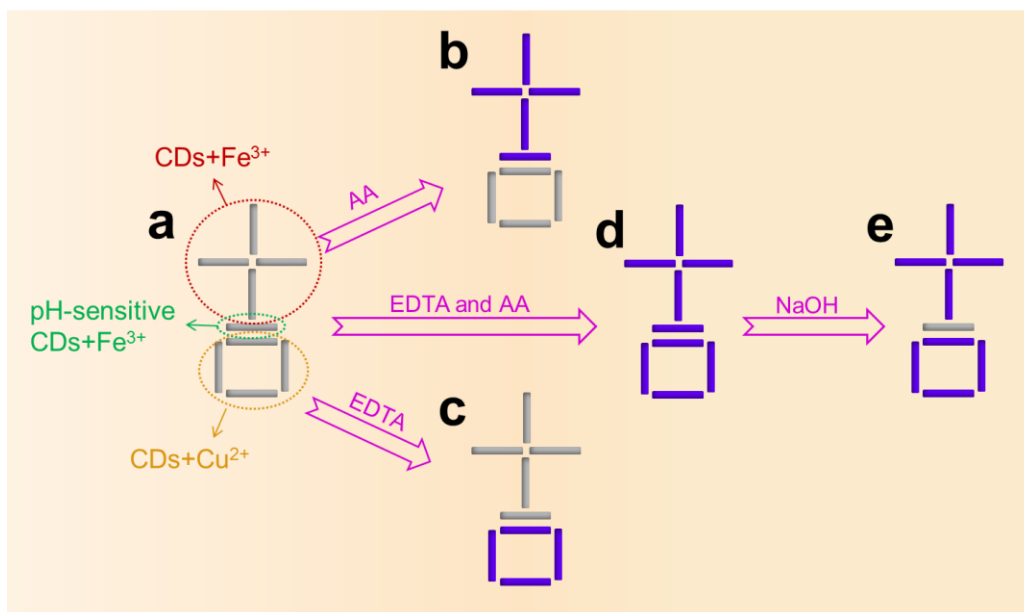

**Fig. S7** Designed template pattern for Figure S8.

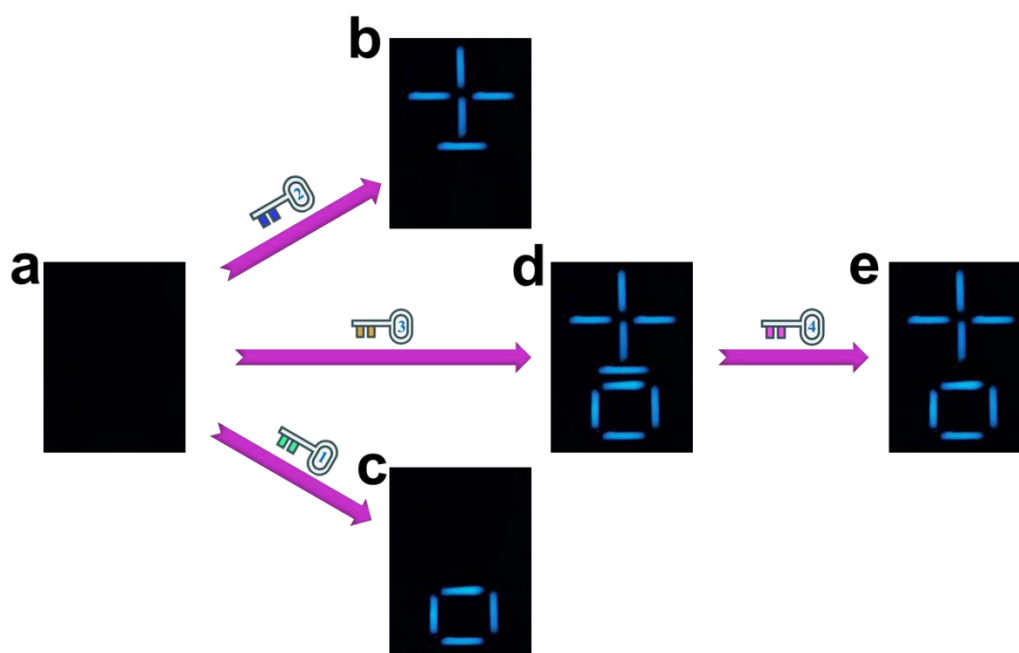

**Fig. S8** Deluded information application. (a) Encryption pattern under UV light. (b-e) The obtained information after using the key on the encrypted pattern: (b) key-2, (c) key-1, (d) key-3, (e) key-4. Only key-4 can obtain the real information, and others are deluded fake information.

To achieve the subtraction rule, we additionally introduced a pH-sensitive CDs,<sup>S7</sup> which will quench at pH larger than 5. The pattern is designed according to Fig. S7, and the fluorescent ink is sprayed on the specific position with two kinds of CDs followed by adding  $\text{Fe}^{3+}$  and  $\text{Cu}^{2+}$  at the specific position. Under UV light, the document shows nothing information in Fig. S8a. Whatever using key-1 (EDTA) or key-2 (AA) or key-3 (EDTA+AA), it will get “士” (means soldier) or “口” (means mouth) or “吉” (means lucky) that are all fake information (Fig. S8b-d). The fake information here is readable and not messy code. Only using key-4 (NaOH) in Fig. S8d can get the correct information of “古” (means ancient).

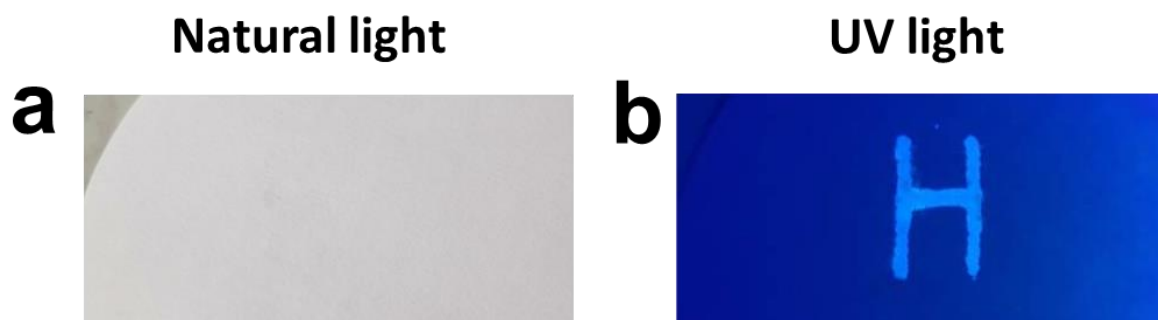

**Fig. S9** Photograph of letter “H” is not visible under (a) natural light, but shows blue handwriting under (b) UV light.

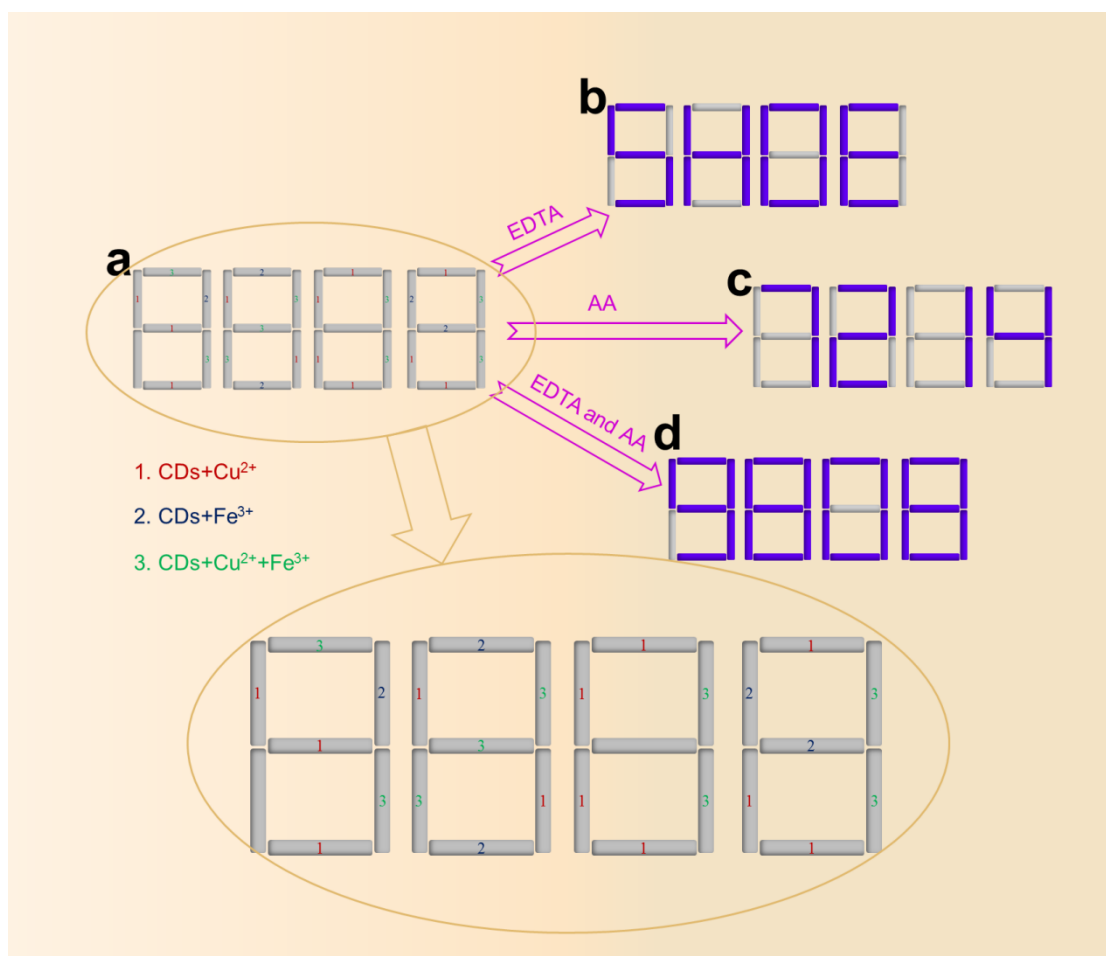

**Fig. S10** Designed template pattern for Figure 4.

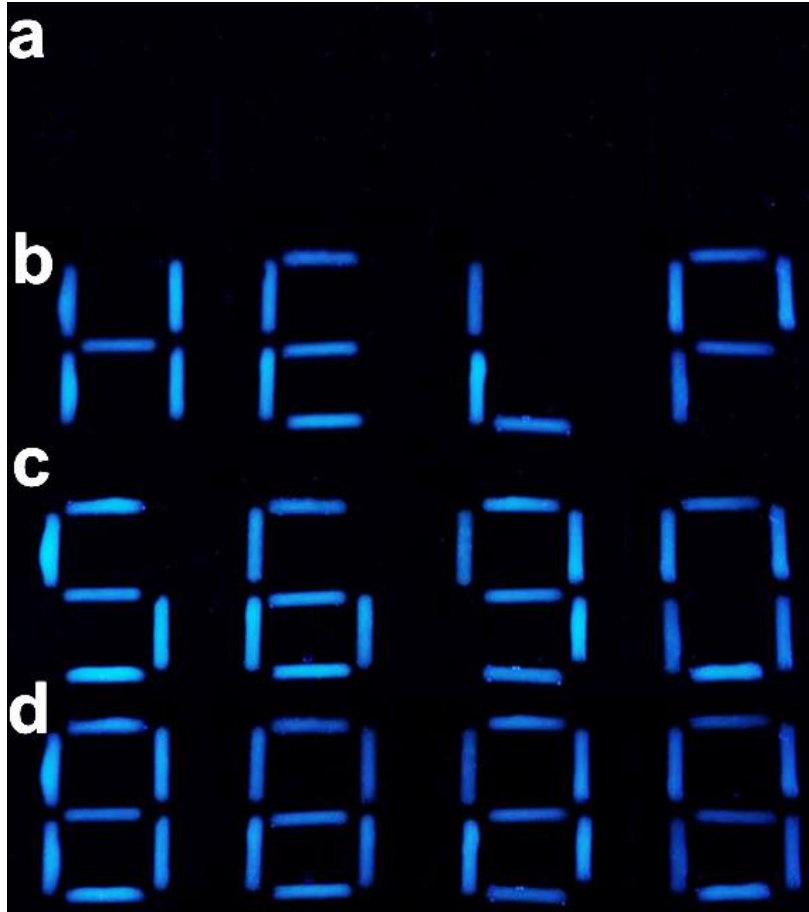

**Fig. S11** (a) Encryption pattern under UV light. (b-d) The obtained information after using different keys on the encrypted pattern: (b) key-1, (c) key-2, (d) key-3. Only key-3 can obtain the real information, and the designed overlap pattern can save storage space.

As shown in Fig. S11a, the encrypted information cannot be seen under the UV light. Using key-1, key-2 and key-3 on encrypted information can see "HELP" (Fig. S11b), "5690" (Fig. S11c) and "8888" (Fig. S11d), respectively. The advantage of this encryption method is that the fake information obtained by using incorrect decryption method is still readable, so that it will mislead others to think that it is useful information thus giving up further decrypt.

## Supporting References

- S1. Z. Song, T. Lin, L. Lin, S. Lin, F. Fu, X. Wang and L. Guo, *Angew. Chem. Int. Ed. Engl.*, 2016, **55**, 2773-2777.
- S2. C. Sun, S. Su, Z. Gao, H. Liu, H. Wu, X. Shen and W. Bi, *ACS Appl. Mater. Interfaces*, 2019, **11**, 8210-8216.
- S3. J. Zhao, Y. Zheng, Y. Pang, J. Chen, Z. Zhang, F. Xi and P. Chen, *J. Colloid Interface Sci.*, 2020, **579**, 307-314.
- S4. R. Bandi, N. P. Devulapalli, R. Dadigala, B. R. Gangapuram and V. Guttena, *ACS Omega*, 2018, **3**, 13454-13466.
- S5. J. F. Y. Fong, S. F. Chin and S. M. Ng, *Biosens. Bioelectron.*, 2016, **85**, 844-852.
- S6. Y. Zhang, D. Dreisinger, T.-A. Zhang, G. Lv, W. Zhang and F. Xie, *Hydrometallurgy*, 2019, **188**, 54-63.
- S7. P. Yang, L. G. Zhou, S. L. Zhang, N. Wan, W. Pan and W. Z. Sheng. *J. Appl. Phys.*, 2014, **116**, 244306.
